# Supplementary material for: (S)-10-Hydroxycamptothecin Inhibits Esophageal Squamous Cell Carcinoma Growth In Vitro and In Vivo Via Decreasing Topoisomerase I Enzyme Activity
Source: MDPI journal article supplement (doi:10.3390/cancers11121964), 2019-12-06

# Supplementary Materials: (S)-10-Hydroxycamptothecin Inhibits Esophageal Squamous Cell Carcinoma Growth In Vitro and In Vivo Via Decreasing Topoisomerase I Enzyme Activity

Mengqiu Song, Shuying Yin, Ran Zhao, Kangdong Liu, Joydeb Kumar Kundu, Jung-Hyun Shim, Mee-Hyun Lee and Zigang Dong

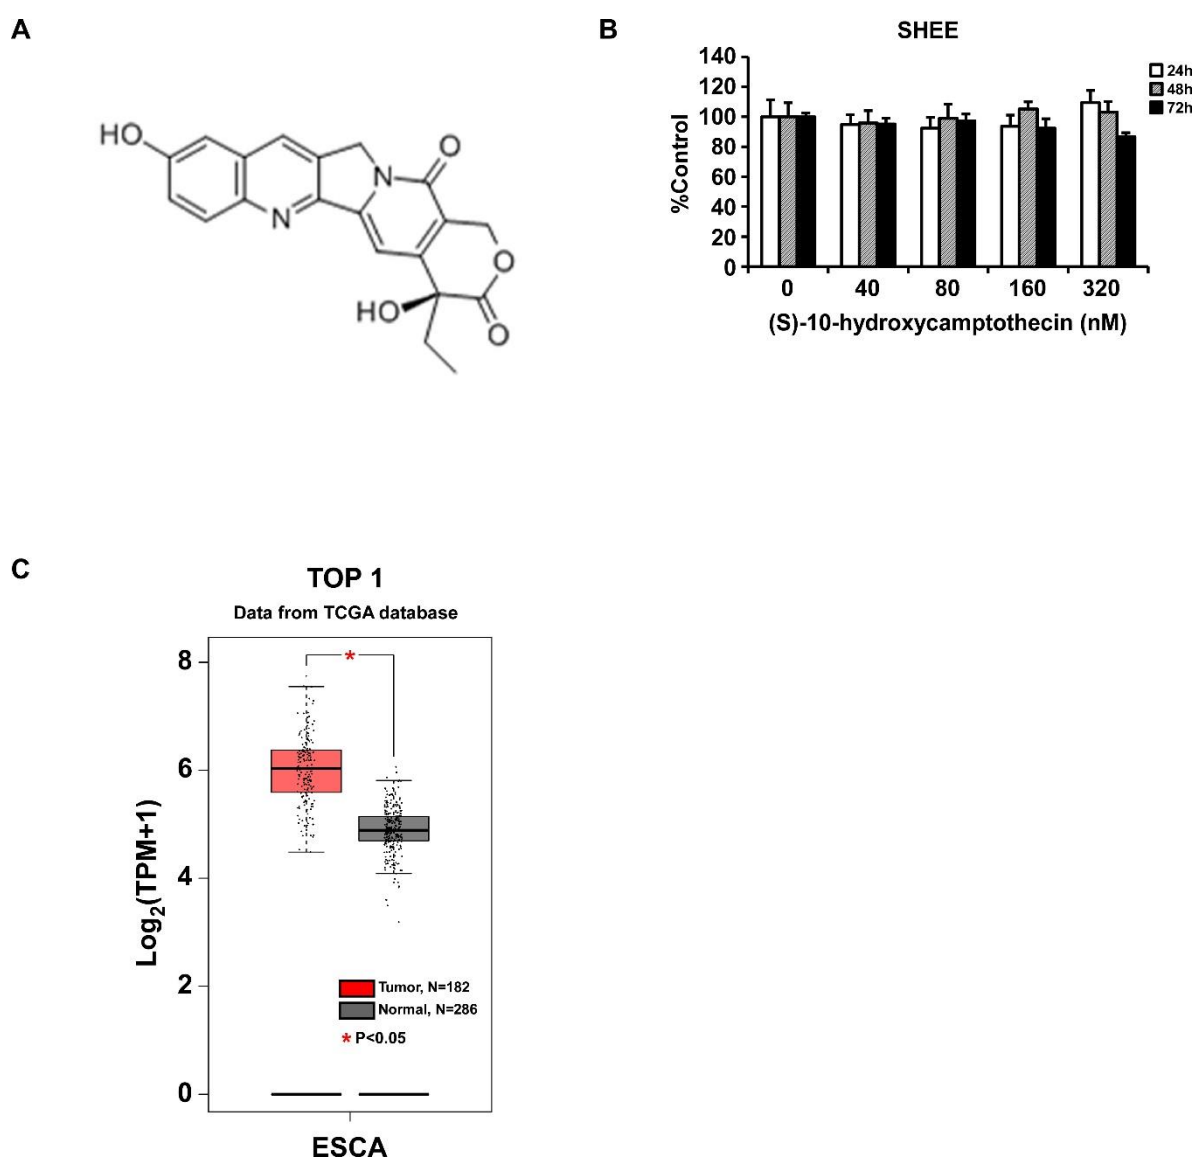

**Figure S1.** (A). The chemical structure of HCPT; (B). Cytotoxicity of HCPT on normal esophageal epithelial cell SHEE. (C). TOP I gene showed significantly enrichment and amplified in mRNA level in esophageal patient tissues compared to normal tissues in the TCGA data base.

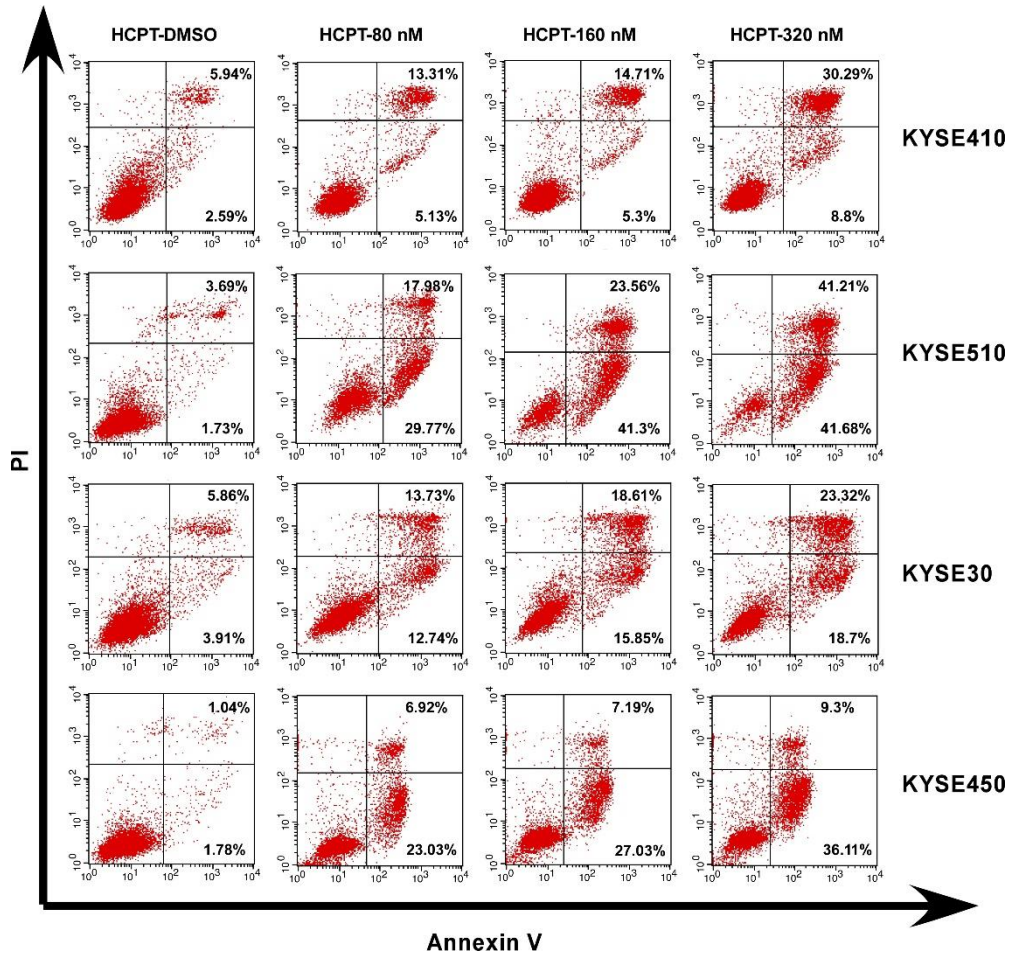

**Figure S2.** Annexin V and propidium iodide double staining method was used to detect apoptotic cells by flow cytometry.

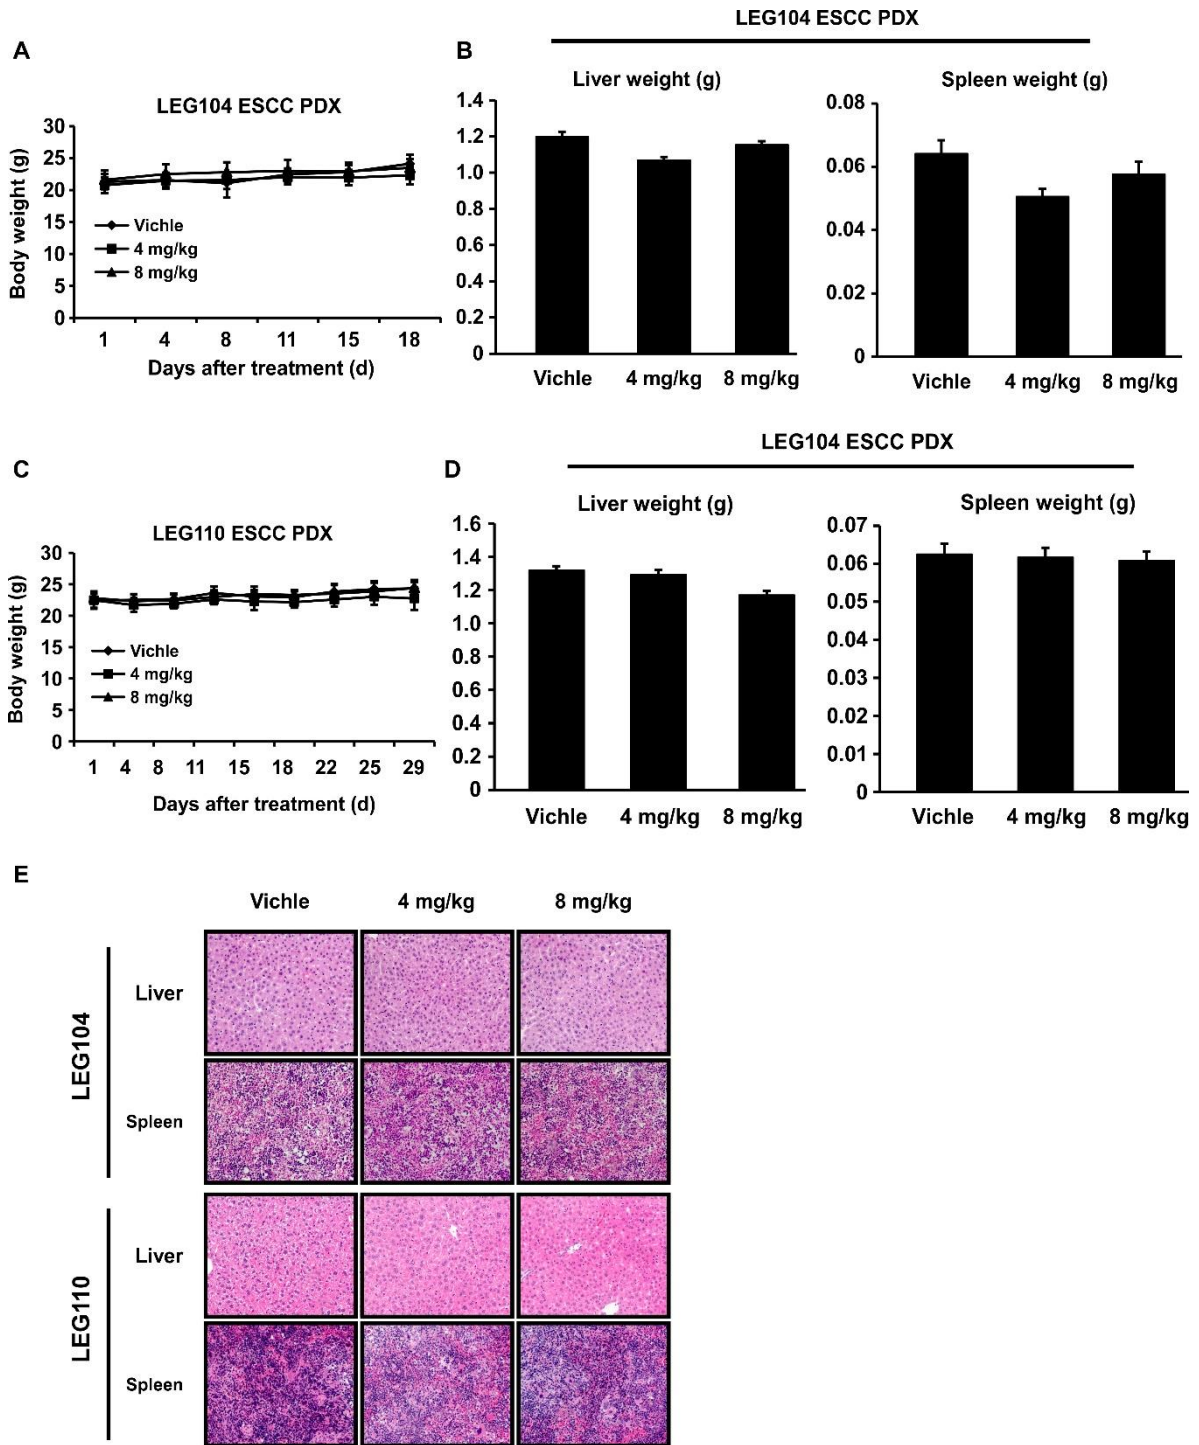

Figure S3. HCPT administration showed no toxicity in PDX animal experiment.

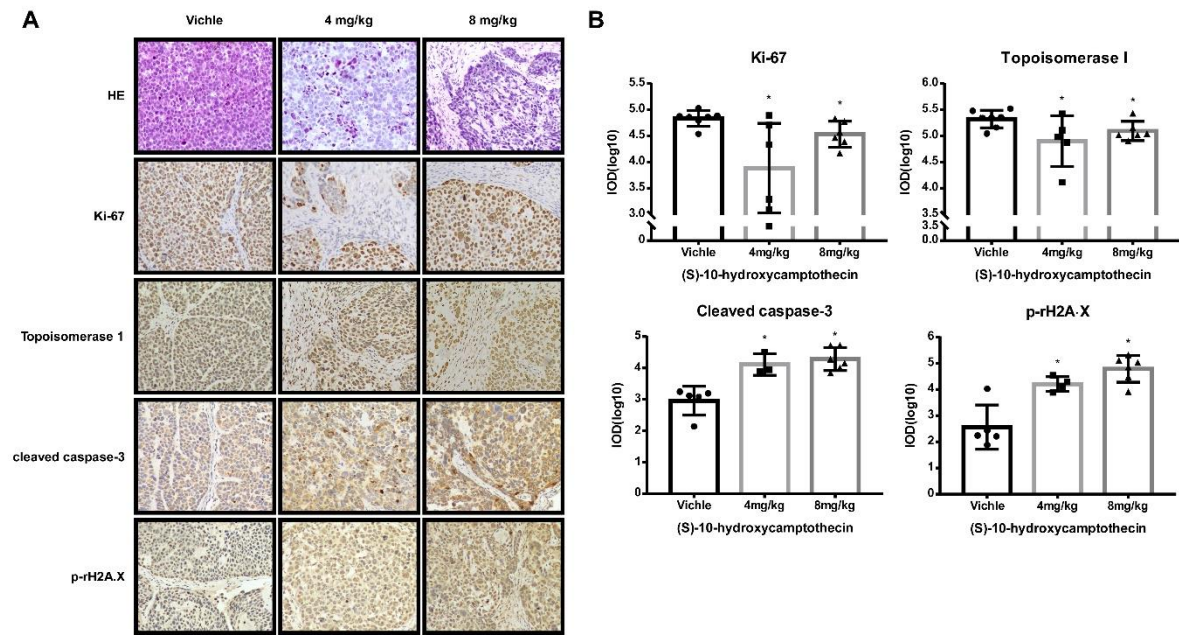

**Figure S4.** IHC staining in LEG110 PDX tissue specimens (100× magnification).

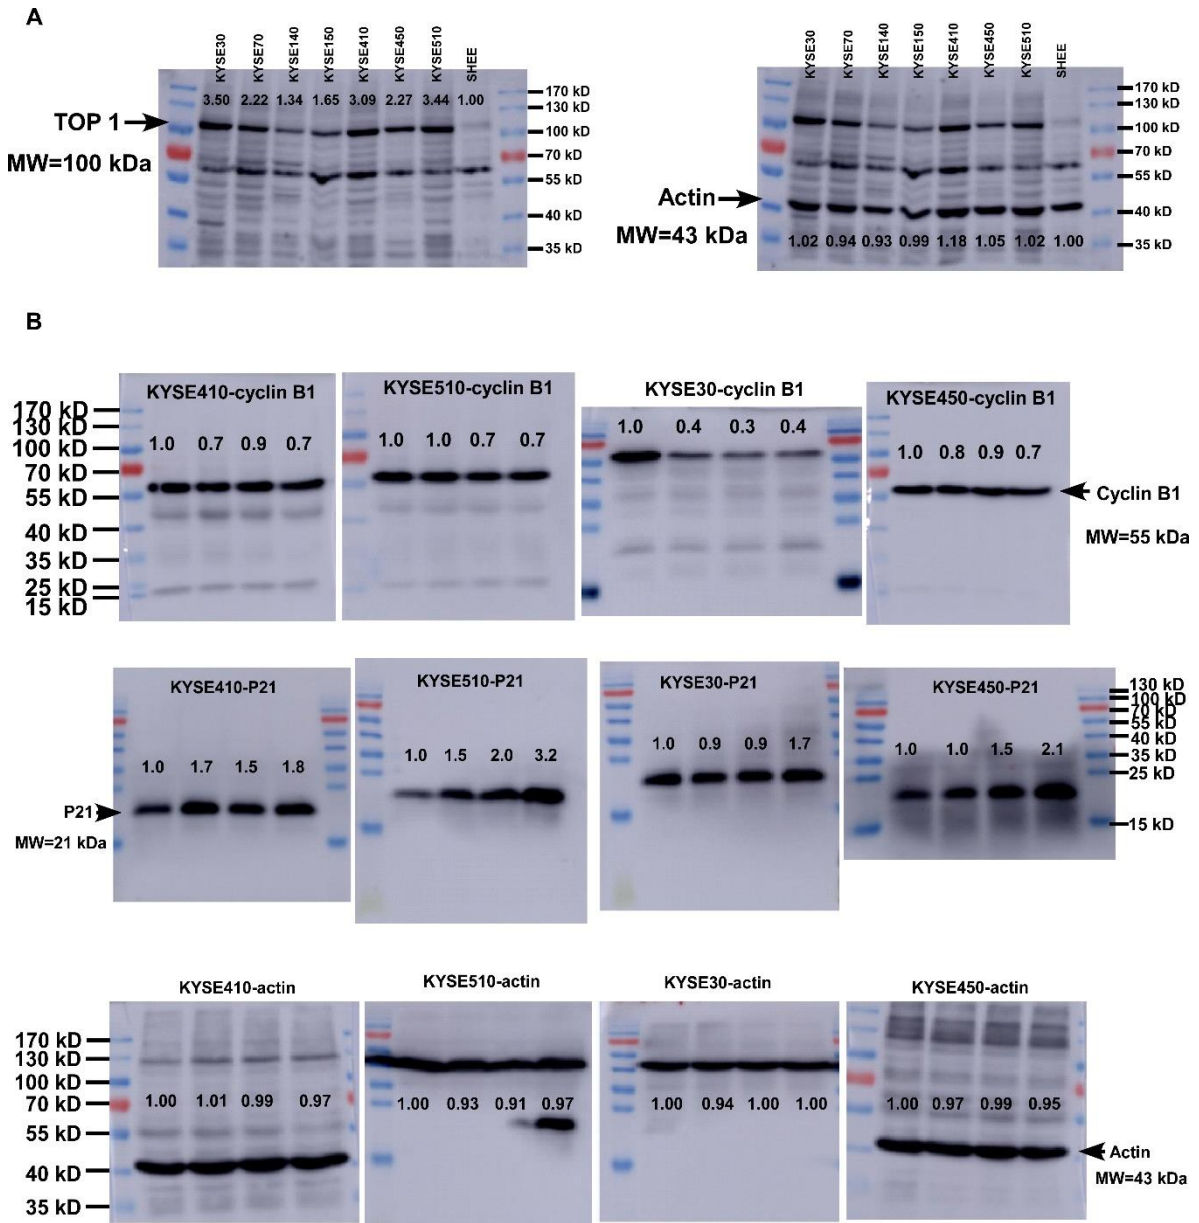



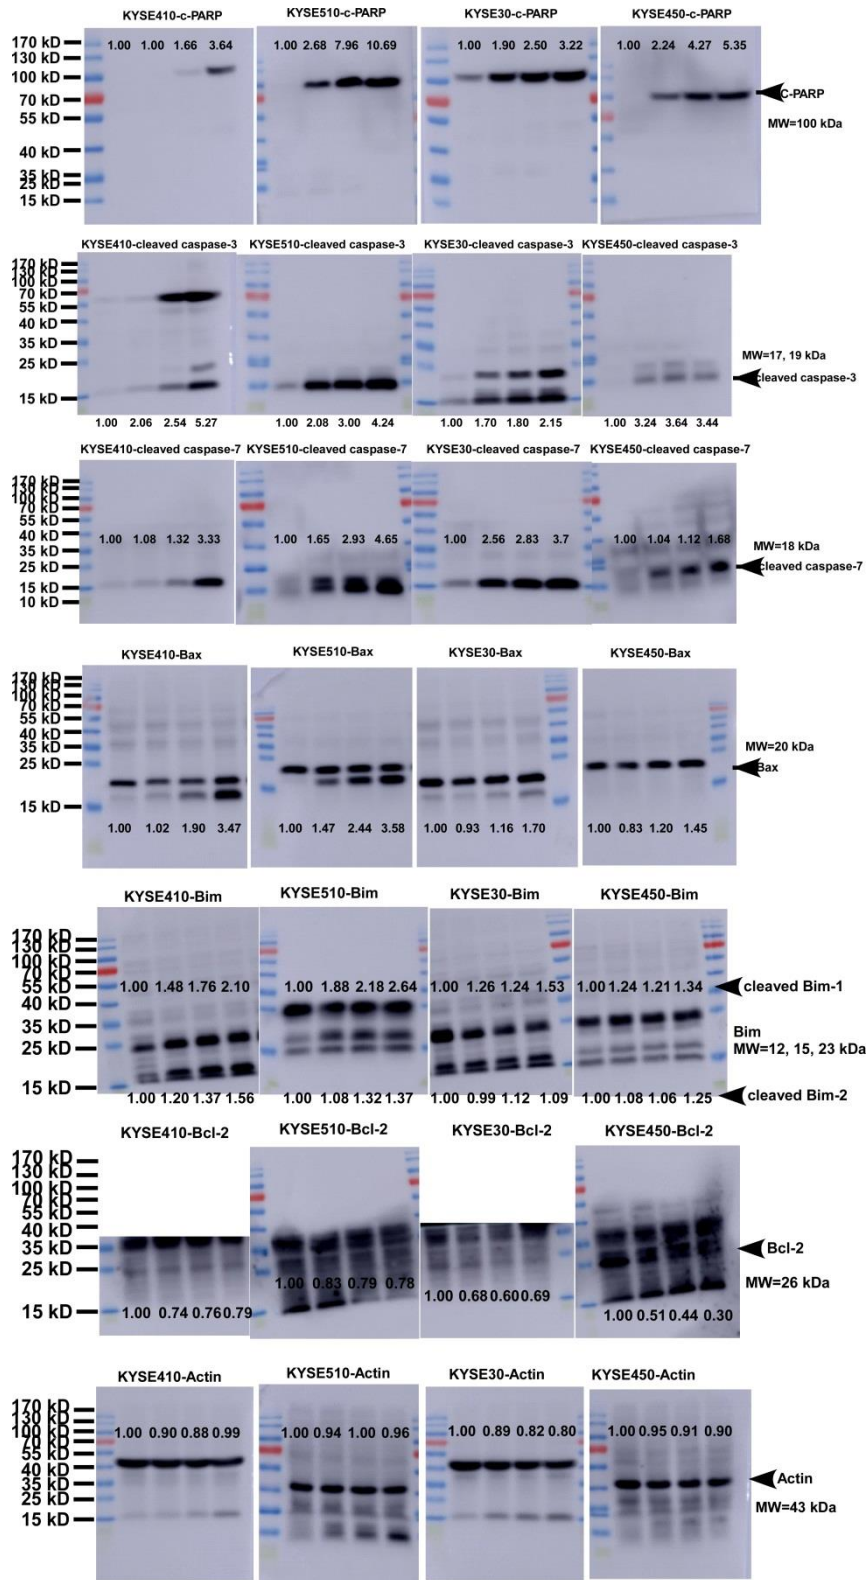

**Figure S6.** The original western blot data of the expression of apoptosis markers in the four candidate cell lines.

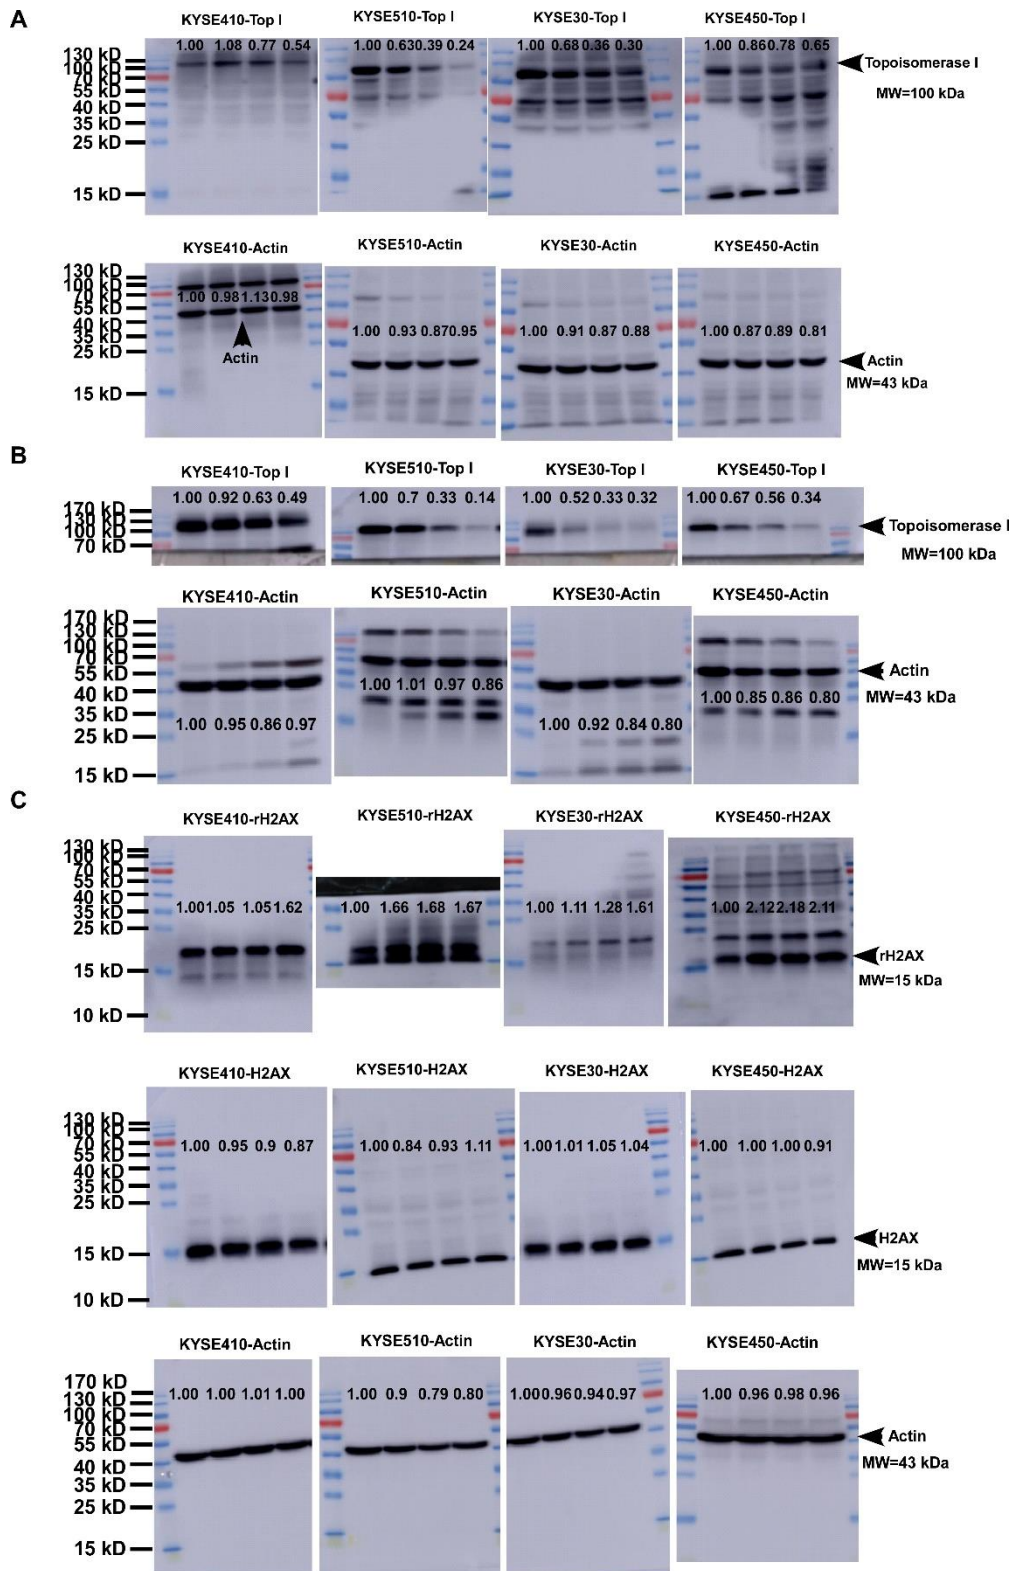

**Figure S7.** The original western blot data of the expression of TOP I and rH2AX in the four candidate cell lines 48 or 72 h after HCPT treatment.

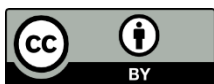

Supplement: s1 [file s1]
